# Supplementary material for: The Rho guanine nucleotide exchange factor ARHGEF5 promotes tumor malignancy via epithelial–mesenchymal transition
Source: PubMed Central journal article supplement (PMC5047960; doi:10.1038/oncsis.2016.59), 2016-09-12

## Supplementary information

### Supplementary figure legends

**Figure S1. EMT is induced by TGF- $\beta$  in MCF10A cells.** (A) MCF10A cells were treated with or without TGF- $\beta$ 1 for 48 h and stained for E-cadherin, N-cadherin, and F-actin. Cell morphology was observed under a phase-contrast microscope (PC). White arrowheads in the F-actin images indicate the locations of podosome-like structures. Scale bar: 20  $\mu$ m. (B) MCF10A cells were treated with TGF- $\beta$ 1 for the indicated periods, and the levels of the indicated proteins analyzed by western blotting. (C) MCF10A cells treated with or without TGF- $\beta$ 1 were subjected to wound-healing assays. Scale bar: 100  $\mu$ m. Values represent the mean  $\pm$  SD (n=3, \*\* $p$ <0.01).

**Figure S2. The ROCK inhibitor, Y27632, suppresses TGF- $\beta$ -induced EMT phenotypes in MCF10A cells.** (A) MCF10A cells were treated with TGF- $\beta$  for 48 h in the presence or absence of Y27632 and the cells stained with anti-E-cadherin or anti-N-cadherin. Scale bar: 20  $\mu$ m. (B) MCF10A cells were treated with TGF- $\beta$  for 48 h in the presence or absence of Y27632 and then subjected to wound-healing assays. Scale bar: 200  $\mu$ m. (C) The migration rates of the indicated cells are shown. Values represent the mean  $\pm$  SD (n=3, \*\*\* $p$ <0.001). (D) MCF10A cells overexpressing Flag-ARHGEF5 were treated with Y27632 for 24h and MLC phosphorylation and the indicated proteins was analyzed by western blotting.

**Figure S3. ARHGEF5 KD does not affect expression of EMT-related transcription factors.** Mock and ARHGEF5-KD MCF10A cells were treated with or without TGF- $\beta$  for the indicated periods and expression of the indicated EMT-related transcription factors was assessed by RT-PCR. PCR was performed with the following primers:

ACTA2 forward, 5'-TTCAATGTCCCAGCCATGTA-3';  
ACTA2 reverse, 5'-GAAGGAATAGCCACGCTCAG-3';  
SNAI1 forward, 5'-TTTACCTTCCAGCAGCCCTA-3';  
SNAI1 reverse, 5'-CCCCTGTCTCATCTGACA-3';  
SNAI2 forward, 5'-TCGGACCCACACATTACCTT-3';  
SNAI2 reverse, 5'-TTGGAGCAGTTTTTGCCTG-3';  
SNAI3 forward, 5'-ACTGCCACAAACCCTACCAC-3';  
SNAI3 reverse, 5'-ATAGGGCTTCTCCCCTGTGT-3';  
TWIST1 forward, 5'-GTCCGCAGTCTTACGAGGAG-3';  
TWIST1 reverse, 5'-TGGAGGACCTGGTAGAGGAA-3';  
TWIST2 forward, 5'-AGCAAGAAGTCGAGCGAAGA-3';  
TWIST2 reverse, 5'-CAGCTTGAGCGTCTGGATCT-3';  
ZEB1 forward, 5'-TGCCTGAGTGTGGAAAAGC-3';

ZEB1 reverse, 5'-TGGTGATGCTGAAAGAGACG-3';  
ZEB2 forward, 5'-CGCTTGACATCACTGAAGGA-3'; and  
ZEB2 reverse, 5'-CTTGCCACACTCTGTGCATT-3'.

**Figure S4. Arhgef5 is required for Src-induced podosome formation.** The role of Arhgef5 in Src-induced transformation was confirmed using Arhgef5-knockout mouse embryonic fibroblasts (KO MEFs) harboring a Tet-on inducible system of active Src. In wild-type MEFs (WT), Src upregulation induced the formation of podosome rings in which phospho-cortactin and F-actin were enriched. Arhgef5 KO markedly suppressed podosome ring formation, while re-expression of Arhgef5, but not  $\Delta$ DH lacking the GEF domain, restored podosome ring formation. Furthermore, localization analysis using Arhgef5-GFP revealed that Arhgef5 accumulates in podosomes. These results corroborated the essential role of Arhgef5 in Src-induced podosome formation in fibroblasts. (A) WT or Arhgef5 KO MEFs expressing mock vector, Arhgef5, and  $\Delta$ DH, all harboring a Tet-on system for active Src, were treated with Dox for the indicated periods. Cells were then stained for phospho-cortactin and F-actin. The insets in the bottom panels are magnified views of podosome rings. Scale bar: 20  $\mu$ m. (B) The average number of podosome rings formed per cell for the indicated cell lines is indicated. Values represent the mean  $\pm$  SD (n=50, \*\* $p$ <0.01). (C) Arhgef5 KO MEFs expressing the Arhgef5-GFP construct were stained for F-actin (upper) and GFP signals observed (lower). White arrowheads indicate the locations of podosome rings. Scale bar: 10  $\mu$ m.

**Figure S5. Model of ARHGEF5 functions.** EMT-mediated upregulation of the Src-ARHGEF5-Rho axis results in formation of a signaling platform at focal adhesions and/or podosome/invadopodia, which triggers cell signaling and promotes invasion/metastasis and tumor growth.

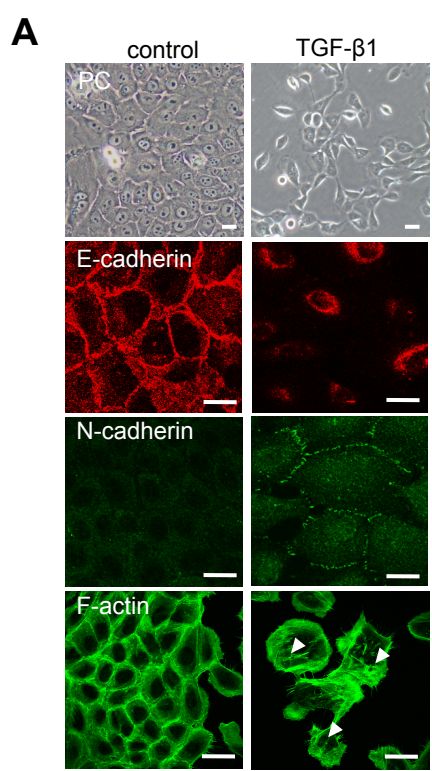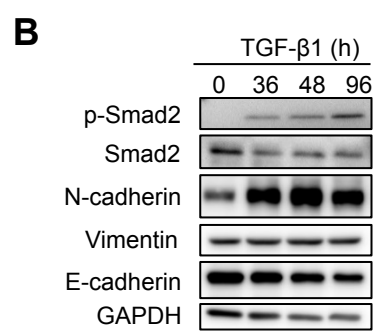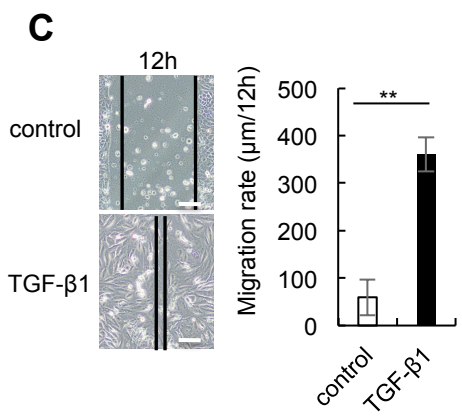

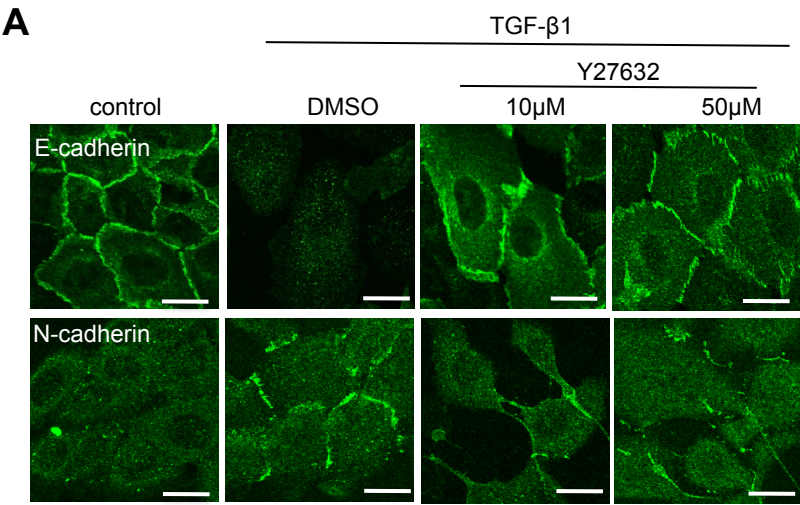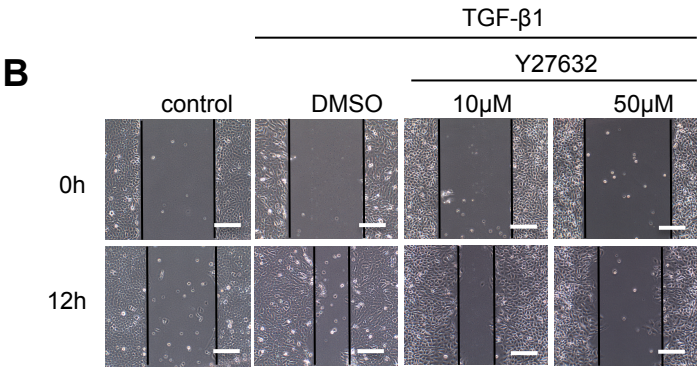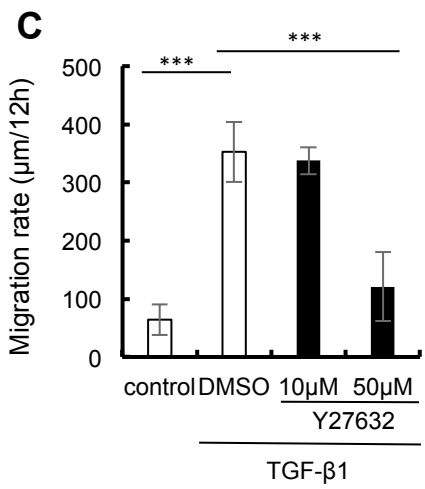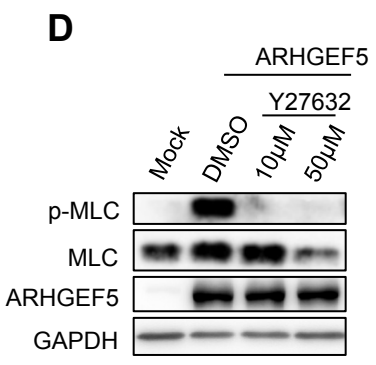



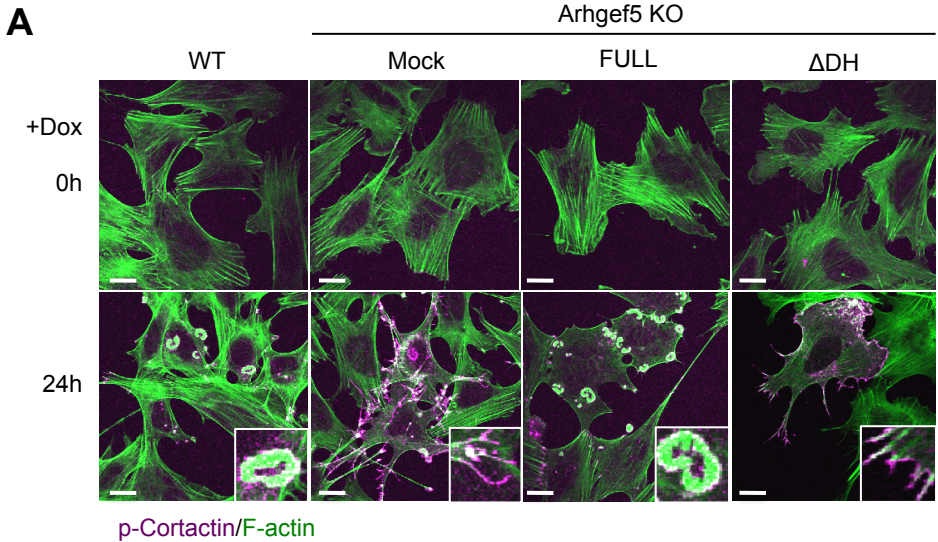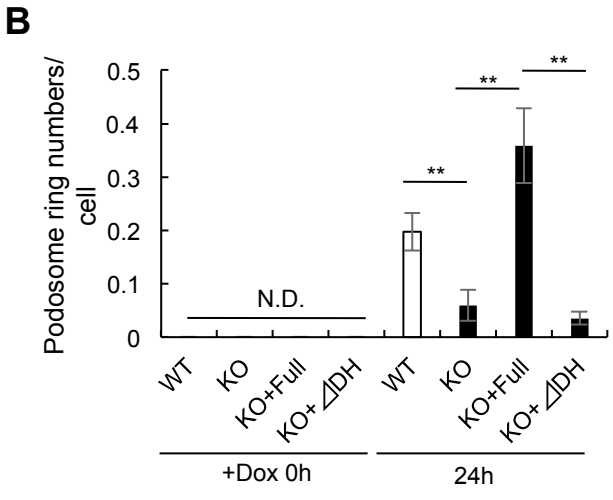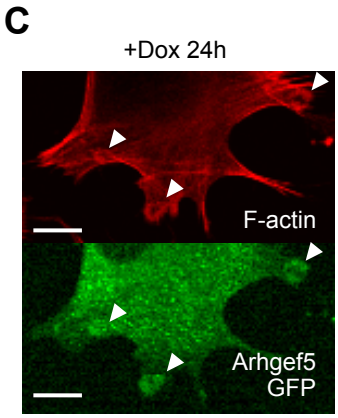

Fig. S5

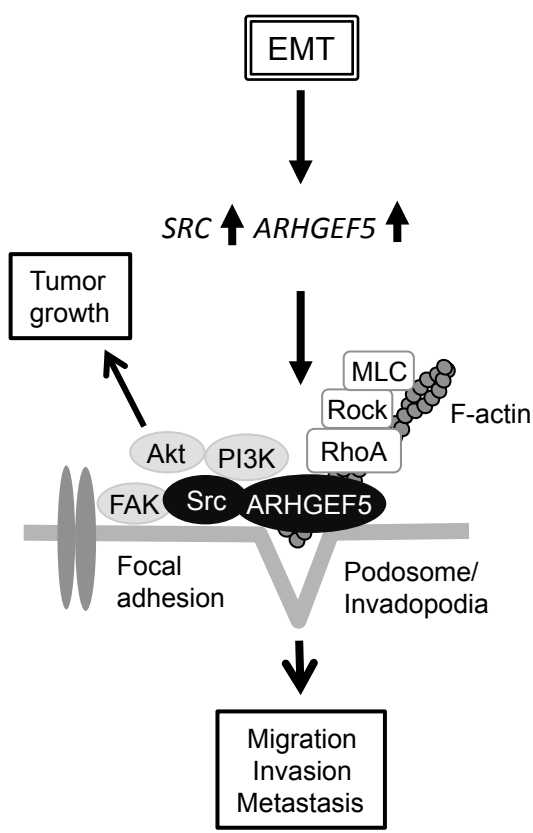

Supplement: oncsis201659x1.pdf [file oncsis201659x1.pdf]
